1 Vegetation characteristics control sediment and nutrient retention  
2 on but not underneath vegetation in floodplain meadows

3

4 Vegetation characteristics control sediment retention

5

6 Lena Kretz<sup>1,2\*</sup>, Elisabeth Bondar-Kunze<sup>3,4</sup>, Thomas Hein<sup>3,4</sup>, Ronny Richter<sup>1,5,6</sup>, Christiane  
7 Schulz-Zunkel<sup>2</sup>, Carolin Seele-Dilbat<sup>1,2</sup>, Fons van der Plas<sup>1,7</sup>, Michael Vieweg<sup>2</sup>, Christian  
8 Wirth<sup>1,5,8</sup>

9

10 <sup>1</sup>: Systematic Botany and Functional Biodiversity, Life science, Leipzig University, Germany

11 <sup>2</sup>: Helmholtz Centre for Environmental Research (UFZ), Department Conservation Biology,  
12 Germany

13 <sup>3</sup>: University of Natural Resources and Life Sciences, Vienna, Institute of Hydrobiology and  
14 Aquatic Ecosystem Management, Austria

15 <sup>4</sup>: WasserCluster Lunz, Austria

16 <sup>5</sup>: German Centre for Integrative Biodiversity Research (iDiv) Halle-Jena-Leipzig, Germany

17 <sup>6</sup>: Geoinformatics and Remote Sensing, Institute for Geography, Leipzig University, Germany

18 <sup>7</sup>: Plant Ecology and Nature Conservation, Wageningen University, Droevendaalsesteeg 4,

19 6708 PB Wageningen, The Netherlands

20 <sup>8</sup>: Max Planck Institute of Biogeochemistry, Germany

21 \* Corresponding author: Lena Kretz

22 E-mail: [lena.kretz@uni-leipzig.de](mailto:lena.kretz@uni-leipzig.de)

## 23 **Abstract**

24       Sediment and nutrient retention are essential ecosystem functions that floodplains  
25 provide and that improve river water quality. During floods, the floodplain vegetation  
26 retains sediment, which settles on plant surfaces and the soil underneath plants. Both  
27 sedimentation processes require that flow velocity is reduced, which may be caused by the  
28 topographic features and the vegetation structure of the floodplain. However, the relative  
29 importance of these two drivers and their key components have rarely been both  
30 quantified. In addition to topographic factors, we expect vegetation height and density,  
31 mean leaf size and pubescence, as well as species diversity of the floodplain vegetation to  
32 increase the floodplain's capacity for sedimentation. To test this, we measured sediment  
33 and nutrients (carbon, nitrogen and phosphorus) both on the vegetation itself and on  
34 sediment traps underneath the vegetation after a flood at 24 sites along the River Mulde  
35 (Germany). Additionally, we measured biotic and topographic predictor variables.  
36 Sedimentation on the vegetation surface was positively driven by plant biomass and the  
37 height variation of the vegetation, and decreased with the hydrological distance (total  
38  $R^2=0.56$ ). Sedimentation underneath the vegetation was not driven by any vegetation  
39 characteristics but decreased with hydrological distance (total  $R^2=0.42$ ). Carbon, nitrogen  
40 and phosphorus content in the sediment on the traps increased with the total amount of  
41 sediment (total  $R^2=0.64$ , 0.62 and 0.84, respectively), while C, N and P on the vegetation  
42 additionally increased with hydrological distance (total  $R^2=0.80$ , 0.79 and 0.92, respectively).  
43 This offers the potential to promote sediment and especially nutrient retention via  
44 vegetation management, such as adapted mowing. The pronounced signal of the  
45 hydrological distance to the river emphasises the importance of a laterally connected  
46 floodplain with abandoned meanders and morphological depressions. Our study improves

47 our understanding of the locations where floodplain management has its most significant  
48 impact on sediment and nutrient retention to increase water purification processes.

## 49 **Introduction**

50 Worldwide, streams and rivers suffer from large loads of sediment and nutrients, which is  
51 predominantly caused by anthropogenic activities (1–3). Soil erosion and overfertilization,  
52 caused by industrial agriculture and forestry, increase the loads of sediment and nutrients in  
53 river systems and cause eutrophication and siltation (4–6). Additionally, the process of  
54 sediment transport along the river is often interrupted by hydro-engineering infrastructure  
55 (6). River floodplains, however, can act as a sink for sediment and its associated nutrients by  
56 retaining these during floods (7,8), thus providing the important ecosystem function of  
57 sediment and nutrient retention (9,10).

58 Natural floodplains reduce sediment and nutrient transport to downstream areas during  
59 inundation. Especially in hydrologically connected systems, a large amount of the annual  
60 riverine sediment and nutrient load can be retained in floodplains. The amount increases  
61 with the inundation duration and the area of inundation (11). The accumulated nutrients  
62 can have a positive effect on the productivity of the floodplain vegetation (12). However,  
63 anthropogenic activities have strongly diminished floodplain areas, due to channelization,  
64 embankments, bank stabilization, and river straightening (7,13,14). Consequently,  
65 worldwide floodplains are considered threatened ecosystems (13,14). As a result, floodplain  
66 restoration efforts have increased during the last decades. Many countries started programs  
67 emphasizing the river-floodplain reconnection for restoring ecological conditions, but also  
68 for flood protection. Furthermore, reconnection measures are expected to affect the  
69 retention capacity of floodplains (15), but its drivers still need to be better integrated into

70 river and floodplain restoration and management (16). However, to manage floodplains for  
71 optimal sediment and nutrient retention, we need to understand how vegetation structure,  
72 as well as the composition and diversity of plant communities, affect sedimentation and  
73 how these biotic drivers interact with the hydromorphological control.

74 Sediment retention is a complex phenomenon that depends on different biogeomorphic  
75 processes in the floodplain (17). While deposition of coarse sediment is mostly influenced  
76 by the topography of the floodplain, the vegetation type and structure influencing fluvial  
77 processes and sediment transport (18,19) are most relevant for sedimentation of finer grain  
78 sizes (17,20,21). Communities of herbaceous vegetation were more efficient in  
79 accumulating fine sediment compared to shrublands and floodplain forests (22), and reed  
80 beds caused more nitrogen and phosphorus deposition than grass and woodlands (12).

81 Within a flume experiment, we showed in a previous study, that the structural  
82 characteristics of the community (biomass, density, height, structural diversity, and leaf  
83 pubescence) increase sedimentation under controlled conditions (23). However, this is the  
84 first study that investigates *in situ* measurements of a real flood event by (1) focusing on  
85 sedimentation within the vegetation, separating the process of sedimentation on vegetation  
86 from the process of sedimentation underneath the vegetation, (2) investigated the role of  
87 species diversity, leaf surface structure and community structure, and (3) combined these  
88 vegetation characteristics with topographical parameters of the floodplain, thus allowing to  
89 quantify the relative importance of vegetation and topography.

90 The sediment retention capacity of a floodplain is known to vary with different structural  
91 parameters of the vegetation, mostly measured around (in front and behind) vegetation  
92 patches. Generally, it was found that biomass increases sediment retention (20,24,25),

93 which was also the case in the flume experiments for sedimentation on the vegetation  
94 (23,26) and partly also underneath the vegetation (23). Dense floodplain vegetation has  
95 been suggested to be very efficient in accumulating fine sediment (22,27). It reduces the  
96 flow velocity and thus allows sediment to sink and deposit (28,29). Here, also the variation  
97 of the vegetation height may have an impact on sedimentation, since varying vegetation  
98 height cause turbulence and might increase and decrease flow velocities locally. In the  
99 flume experiment a negative relationship was found between height variation and  
100 sedimentation on the vegetation (23). It was found that the deposition of finer sediment  
101 (silt and clay) is controlled by vegetation height in herbaceous floodplain vegetation (30).

102 Riparian zones and floodplain meadows are hotspots of biodiversity (14). At the same  
103 time, they are one of the most threatened habitats in the world (31,32). Despite this,  
104 species diversity *per se* is rarely studied in the context of sediment retention on floodplains,  
105 even though it is known to determine other ecosystem functions such as productivity and  
106 nutrient dynamics (33). The results of the flume experiment only showed evidence for  
107 effects of species richness on sedimentation in the absence of identity effects (26). Species  
108 diversity has also been shown to correlate with structural diversity of vegetation (34), which  
109 was found to increase sedimentation (23). Dedicated biodiversity experiments have  
110 revealed that diverse grasslands exploit the growing space in a complementary fashion and  
111 thus have a higher density and taller stature than less diverse grasslands (35,36). While we  
112 account for these two variables directly, there may be additional effects that go beyond the  
113 mean characteristics of the vegetation. Combining for example tall/sparse with small/dense  
114 plant species may be particularly effective for sediment retention. The trait combination  
115 might increase the overall sedimentation irrespective of total density or stature. No

116 significant effects of the species diversity of herbaceous vegetation on sediment retention  
117 were found in front of, and behind a vegetation patch when comparing monocultures with a  
118 three-species mixture in an experiment (37). However, the investigation of a longer diversity  
119 gradient under field conditions could yield another picture.

120 Besides vegetation structure, leaf surface structure of the vegetation also matters for  
121 sedimentation. In particular, leaf pubescence has been shown to positively and leaf area on  
122 not-haired leaves negatively drive sediment retention at the level of herbaceous leaf  
123 surfaces (23,38,39). Therefore, the mean expression of these traits in the vegetation may  
124 also be important for sedimentation at the level of floodplain vegetation patches, which has  
125 rarely been considered in studies on sedimentation in herbaceous vegetation.

126 Topographic variables are the main abiotic factors that could explain sediment  
127 distribution within the floodplain. Discharge and with it, inundation depth are strongly  
128 affected by elevation. It was found that the location within the floodplain is relevant for  
129 sedimentation (19). Fine sediment is transported farther along the river and into the  
130 floodplain than coarse sediment and only settles in areas with reduced flow velocity (28,29).  
131 In general, sedimentation was found to decrease with increasing distance from the river  
132 (27,40). However, a straight line does not necessarily represent the topographic diversity of  
133 a dynamic riverine floodplain and the winding path the water travels into the floodplain  
134 during floods. Therefore, the length of the shortest path of lowest elevation is a better  
135 measure of the ways the river water travels from the river into the floodplain during floods.  
136 Such a measure for the true 'hydrological distance' may thus better represent the  
137 topography of the floodplain. Some studies used other terms to describe a similar measure  
138 such as the flow path (41,42) or the hydrological connectivity (15,43,44).

139 The aim of this study was a holistic analysis putting vegetation and topography control in  
140 perspective by first disentangling sedimentation on and underneath the vegetation under *in*  
141 *situ* conditions, second by quantifying the relative importance of vegetation characteristics  
142 in relation to topographical parameter and third, by investigated the effects of additional  
143 vegetation characteristics (species diversity and leaf surface structure) on sedimentation  
144 within a vegetation patch. We tested the following hypotheses:

145 (H1) Sedimentation on and underneath the vegetation increases with increasing vegetation  
146 biomass, cover, vertical density, vegetation height and height variation.

147 (H2) Sedimentation on and underneath the vegetation decreases with increasing  
148 hydrological distance from the stream.

149 (H3) Sedimentation on and underneath the vegetation increases with increasing plant  
150 species diversity.

151 (H4) Sedimentation on the vegetation increases with increasing leaf pubescence and  
152 decreasing mean leaf area.

153 (H5) Total carbon (C), nitrogen (N) and phosphorus (P) in the sediment on and underneath  
154 the vegetation increase with the total amount of sediment deposited.

155



## 156 **Material and Methods**

### 157 **Study site**

158 The study was located along the Mulde River in Central Germany (S1 Figure), close to its  
159 mouth into the Elbe River. Along this river section, the river still flows in its natural bed and  
160 has been only moderately modified by hydro-engineering infrastructures and bank  
161 stabilization in the past. About half of the cut-banks are not embanked. The study took place  
162 in the frame of the restoration project 'Wilde Mulde – Revitalisation of a dynamic riverine  
163 landscape in Central Germany'. The project area extends between the towns Raguhn and  
164 Dessau (51°43'-46' N, 12°17'-18' E). Within the project area, we defined three floodplains as  
165 study areas in 2016 (S1 Figure). The Mulde River is dammed around 22 km upstream of the  
166 project area and has another smaller weir about 5 km upstream of the first study area.  
167 Upstream of the study areas, the Mulde River has a mean discharge of  $67 \text{ m}^3 \text{ s}^{-1}$  (gauging  
168 station 'Priorau 560090'). In February 2017 a small flood occurred for several days with  
169 overbank flow conditions and with a peak discharge of  $353 \text{ m}^3 \text{ s}^{-1}$  equals a flood with a  
170 discharge occurring on average every second year. In general, the study area is a mosaic of  
171 hardwood and softwood floodplain forests and meadows, with our study focusing on the  
172 floodplain meadows. The topography of the floodplain meadows is strongly formed by the  
173 river, creating a mosaic of steep slip-off slopes with gravel banks in front, depressions, and  
174 abandoned meanders further away from the river that get reconnected during floods. The  
175 dominant species in the meadows are, depending on microtopography and management,  
176 *Arrhenatherum elatius*, *Bromus inermis*, *Calamagrostis epigejos*, *Elymus repens* and *Phalaris*  
177 *arundinacea*.

## 178 **Vegetation data**

179 In summer 2016, we established a grid of vegetation plots. Within the three study areas,  
180 plots were selected to span the elevation gradient of the slip-off slope and the floodplain  
181 meadow above mean flow conditions using a stratified random sampling strategy. In  
182 autumn 2016 we selected 54 plots (18 plots per study area) for this study using with the  
183 following criteria: (i) plots are fully covered by vegetation; (ii) plots span a gradient of  
184 vegetation height (ranging from 36 cm to 124 cm); (iii) lower elevation plots were given  
185 preference, due to their higher probability to get flooded; (iv) depressions and abandoned  
186 meanders at distance to the river were also represented, while ensuring that the selection  
187 still represents the whole elevation gradient. With this approach, the plots are  
188 representative for the floodplain and at the same time form an observational design by  
189 spanning gradients for regression analysis. Within each plot (2 m x 2 m) we identified all  
190 vascular plant species and estimated the cover of each species in summer 2016 before the  
191 flood. We calculated the Shannon diversity index (45) based on cover. Overall, we  
192 inventoried 44 species with the species richness ranging from 2 to 10 species per plot.

## 193 **Vegetation characteristics**

194 We measured the maximum height of the vegetation using two metrics: (i) the maximum  
195 inflorescence height (highest inflorescence), which represents the maximum vegetation  
196 height, and (ii) the maximum canopy height (highest leaf), which represents the maximum  
197 height of the vegetation surface. Both metrics were measured with the help of a meter stick  
198 five times per plot (in the middle of the square plot and at arm length inside the plot from  
199 each corner). We measured the vegetation height at that time point no matter if the  
200 vegetation hung over or not. We did this once in summer 2016 before the flood and once in

201 spring 2017 after the flood. Additionally, we took images of side views in the form of cross  
202 sections of the vegetation in spring 2017 on all flooded plots to estimate the density and  
203 height distribution of the vegetation. To this end, we placed a camera, 1 m with 90° angle in  
204 front of the plot (Fig 1). At 50 cm inside the plot we positioned a camera background wall so  
205 that every image shows exactly the first 50 cm of the plot (Fig 1, S2 Figure). We carefully  
206 pushed down the vegetation outside the plot with a flooring material. Afterwards we  
207 analysed the images with the statistical software R (46) for height and density distribution in  
208 the same way as done in the flume experiment (23). From these structural images, we  
209 derived the variables vertical density, mean height, median height, and height variation  
210 (Table 1, S2 Figure). The images were colour normalised and resampled from a resolution of  
211 4000 by 6000 pixels to a resolution of 400 by 600 pixels and afterwards transformed into  
212 grey-scale images. In order to perform a binary classification of the image into vegetation  
213 and background, we used the otsu-tresholding method (47), as implemented in the package  
214 EImage (48). All variables are described in Table 1.

215 **Fig 1. Vegetation plots (2m x 2m).** Set-up of the sediment traps and the biomass harvest  
216 after the flood event. Set-up of the camera and the camera background for the structural  
217 images.

218 **Table 1: List of predictor variables.** Predictor variables with detailed explanations, units and sampling dates. \* the length is standardized  
 219 between the images, however not calibrated to any unit.

| Hypothesis | Predictor                | Unit              | Details                                                                         | Sampling date            |
|------------|--------------------------|-------------------|---------------------------------------------------------------------------------|--------------------------|
| H1         | Vegetation cover         | %                 | Estimate of vegetation cover                                                    | summer before flood 2016 |
| H1         | Biomass                  | g m <sup>-2</sup> | Dry weight of biomass harvested after the flood                                 | after flood 2017         |
| H1         | Vertical density         | %                 | Percent of vegetation pixels on the image of standard size                      | after flood 2017         |
| H1         | Mean height              | length*           | Mean height of vegetation pixels on the image                                   | after flood 2017         |
| H1         | Median height            | length*           | Median height of vegetation pixels on the image                                 | after flood 2017         |
| H1         | Height variation         | length*           | Standard deviation of vegetation pixel height on the image                      | after flood 2017         |
| H1         | Highest leaf 16          | cm                | Mean of 5 point measurements of the highest leaf                                | summer before flood 2016 |
| H1         | Highest inflorescence 16 | cm                | Mean of 5 point measurements of the highest inflorescence                       | summer before flood 2016 |
| H1         | Highest leaf 17          | cm                | Mean of 5 point measurements of the highest leaf                                | after flood 2017         |
| H1         | Highest inflorescence 17 | cm                | Mean of 5 point measurements of the highest inflorescence                       | after flood 2017         |
| H2         | Hydrological distance    | m                 | Length of lowest path the river water takes to the plot                         |                          |
|            | Elevation above river    | m                 | Elevation of plot above mean flow conditions of the river: $e_r = e_p - e_{mf}$ |                          |
|            | River kilometre          | km                | Location along the river (last tributary used as point 0)                       |                          |
|            | Precipitation            |                   | Some rainfall while collection of the sediment traps (categorical: no, yes)     | after flood 2017         |
| H3         | Shannon diversity index  |                   | Sum of proportion of species times ln of proportion of species                  | summer before flood 2016 |
| H4         | Leaf pubescence          | %                 | Sum of cover of hairy species                                                   | summer before flood 2016 |
| H4         | Leaf area                | cm <sup>2</sup>   | Mean leaf area per species times species cover on the plot                      | summer before flood 2016 |

## 221 **Study design**

222 For investigating sedimentation on the floodplain, we used artificial lawn (*Kunstrasen*  
223 *Arizona*, Hornbach, 1.05 g m<sup>-2</sup> lawn, 26 cm lawn height, S3 Figure) as sediment traps – a  
224 commonly used and established method (29,49). The material has several advantages: (i) it  
225 can be easily cut to the required size; (ii) it can be flexibly and firmly fixed to the ground, and  
226 (iii) it exposes a surface with a high capacity to collect and keep sediment. To keep the  
227 sward structure as intact as possible, we cut the artificial lawn into narrow strips (10 cm x  
228 100 cm strips), which were carefully inserted into the vegetation at two positions within the  
229 plot (Fig 1, S3 Figure). While sediment traps represent a good method to measure  
230 sedimentation on a standardized surface (thus only affected by surrounding vegetation and  
231 its effects on fluvial processes), a limitation is that it removes the effects of the local fine-  
232 scale vegetation structure and composition on sedimentation. Combining measures of  
233 sedimentation on the vegetation itself, as well as on sediment traps, may be best to  
234 partition the effects of fluvial processes (caused by surrounding conditions) and local  
235 vegetation properties on sedimentation. We deployed the sediment traps on all 54 plots in  
236 January 2017 and fixed them with tent stakes and steel washers (56 cm outer diameter).  
237 During the flood in February 2017, 24 plots were inundated (S1 Figure). We collected the  
238 sediment traps immediately after the flood retreated. In addition, we also harvested the  
239 patch of biomass directly in front of the trap (Fig 1). In the lab, we washed the sediment off  
240 the traps with a few litres of water and dried the sediment-rich water in beakers in a  
241 compartment drier at 70 °C. Afterwards, the dry sediment was weighed. The same was done  
242 with the sediment on vegetation and, additionally, we dried and weighed the biomass itself.  
243 The two sediment trap samples per plot were pooled together as were the two biomass  
244 samples per plot.

## 245 **Nutrient analysis**

246 All sediment samples on the vegetation and on the traps (except two samples with too  
247 little sediment) were sieved (< 2 mm) and analysed for C, N and P. To determine the total C  
248 and N concentration, the dried sediment samples were ground to a fine powder in a ball mill  
249 (Retsch MM2, Vienna, Austria). The homogenized sample was weighed, placed in tin caps  
250 and measured by using the Elemental Analysis Isotope Ratio Mass Spectrometry (EA-IRMS;  
251 EA—Thermo Scientific™ FLASH 2000 HT™; IRMS—Thermo Scientific™ Delta V™ Advantage)  
252 (50). To determine the total P concentration the sediment was also ground to a fine powder  
253 in a ball mill (Retsch MM400). The homogenized samples were measured by using the  
254 Inductively Coupled Plasma Optical Emission Spectrometry (ICP-OES "Arcos", Spectro, Kleve,  
255 D). As indicator for the nutrient quality the N:P ratio was calculated.

## 256 **Topographical variables**

257 The elevation and position of the single plots were measured with a Differential GPS (R8,  
258 Trimble Inc.) The mean elevation of the four plot corners  $e_p$  was expressed as elevation  
259 above the river  $e_r$  (as  $e_r = e_p - e_{mf}$ ). Mean water level height  $e_{mf}$  was calculated per study  
260 area with the digital elevation model (DEM, © GeoBasis-DE, LVermGeo LSA, [m.E. 2016,  
261 C22-7009893-2016]) and the closest gauging station (Priorau, 560090). We calculated the  
262 elevation difference between the water level of the gauging station on the day the DEM was  
263 recorded and the mean water level height (calculated from daily measurements, 1995-  
264 2015). With this, we calculated  $e_{mf}$  for each study area. The hydrological distance was  
265 defined as the length of the shortest path of lowest elevation that the river water takes to a  
266 single plot in the floodplain. It was derived using the flow accumulation approach on the  
267 DEM of the floodplain area and calculated using the TopoToolbox 2 (51) in MATLAB (52). We

268 included longitudinal stream distances as river kilometre in the study to account for the plot  
269 location along the stream, since we visually observed lower flow velocity at the study area  
270 further downstream. The river kilometre was measured along the middle line of the river  
271 starting from the last tributary to the river upstream of the study area. We chose this  
272 tributary as the zero point because it is the last major tributary. Precipitation occurrence  
273 was included as a categorical variable, because some of the traps experienced rainfall after  
274 the flood, before all traps could be collected.

## 275 **Leaf surface traits**

276 We also included two leaf surface traits, leaf pubescence and leaf area (at plot-level – see  
277 below), as predictors of sedimentation, because we showed, with an earlier flume  
278 experiment, that, in controlled settings, pubescence can increase leaf surface sedimentation  
279 and that sedimentation increases with decreasing leaf area on leaves with no or just a few  
280 hairs (39). Out of the 44 species, we classified five as pubescent species (*Carex hirta*, *Galium*  
281 *aparine*, *Urtica dioica*, *Verbascum densiflorum* and *Veronica maritima*). We quantified plot-  
282 level pubescence as the summed cover of these five species. Data about the mean area of  
283 individual leaves were obtained from TRY – a global database of plant traits (53) TRY version  
284 5.0; data used of (54–65). Three species were not included in the leaf area calculation, since  
285 they either had no leaves (*Cuscuta europaea* and *Equisetum pratense*) or because there  
286 were not data available in the TRY database (*Carex praecox*). All three species occurred on a  
287 maximum of two plots, and in these, with densities below 5 % cover. For an estimate of the  
288 leaf area per plot, we summed the cover-weighted leaf areas of all species per plot.

## 289 **Data analysis**

290 All statistical analyses were done with the statistical software R (46). We ran two  
291 separate linear models to investigate which factors drove sedimentation on the vegetation  
292 and on the sediment traps. We also calculated the ratio of sedimentation on the vegetation  
293 to the sedimentation on the traps and run a separate linear model to explain it. Further, we  
294 ran six linear models to explain total amount of C, N and P in the sediment on the  
295 vegetation and in the sediment on the traps. We used the candidate variables listed in Table  
296 1 as explanatory variables; in the ratio model we additionally included the interaction of the  
297 river kilometre and the hydrological connectivity, while in the C, N and P models, we  
298 additionally used the sediment amount as an explanatory variable. To meet model  
299 requirements regarding the normality of the error distribution, the two variables,  
300 “sedimentation on traps” (except for the ratio of sediment on vegetation to on traps) and  
301 “hydrological distance”, were natural log-transformed. We scaled all continuous variables to  
302 ensure comparability of the model estimates. To avoid multicollinearity, we removed  
303 explanatory variables with a variation inflation factor above 5.0 (vif function, car library, 66).  
304 With the remaining variables, we selected the final model with best model fit based on  
305 Akaike’s Information Criterion (stepAIC function, MASS library, 67). We tested the  
306 differences of the N:P ratios close and far from the river using paired two-sample t-tests.  
307 Therefore, the plots were separated by the mean of the hydrological distance.

308



## 309 Results

### 310 General results

311 The median sedimentation on the vegetation was 28.60 g m<sup>-2</sup>, while on the traps the  
312 median sedimentation was about double (60.55 g m<sup>-2</sup>, Table 2). Both, sedimentation on the  
313 vegetation and on the traps were highly variable. Sedimentation on vegetation ranged from  
314 10.36 to 105.56 g m<sup>-2</sup> and sedimentation on traps even ranged from 4.25 to 4955.50 g m<sup>-2</sup>,  
315 where some sediment traps that were heavily packed with sediment (Table 2). Descriptive  
316 statistics for C, N and P and for the explanatory variables are shown in Table 2.

**Table 2: Descriptive statistics.** Descriptive statistic of all continuous variables.

Min=minimum, Max=maximum, Sd=Standard deviation. \* the length is standardized  
between the images, however not calibrated to any unit.

| <b>Variables</b>            | <b>Unit</b>       | <b>Min</b> | <b>Max</b> | <b>Mean</b> | <b>Median</b> | <b>Sd</b> |
|-----------------------------|-------------------|------------|------------|-------------|---------------|-----------|
| Sediment on vegetation      | g m <sup>-2</sup> | 10.36      | 105.56     | 37.33       | 28.60         | 25.96     |
| Sediment on traps           | g m <sup>-2</sup> | 4.25       | 4955.50    | 832.57      | 60.55         | 1440.33   |
| C in sediment on vegetation | g m <sup>-2</sup> | 0.82       | 18.79      | 4.67        | 3.76          | 3.88      |
| N in sediment on vegetation | g m <sup>-2</sup> | 0.05       | 1.00       | 0.37        | 0.36          | 0.22      |
| P in sediment on vegetation | g m <sup>-2</sup> | 0.01       | 0.28       | 0.10        | 0.09          | 0.07      |
| C in sediment on traps      | g m <sup>-2</sup> | 0.56       | 178.49     | 26.09       | 3.98          | 42.68     |
| N in sediment on traps      | g m <sup>-2</sup> | 0.04       | 12.88      | 1.88        | 0.30          | 3.06      |
| P in sediment on traps      | g m <sup>-2</sup> | 0.02       | 3.78       | 0.87        | 0.16          | 1.09      |
| Vegetation cover            | %                 | 7.90       | 90.20      | 50.77       | 52.61         | 21.31     |
| Biomass                     | g m <sup>-2</sup> | 30.12      | 499.16     | 239.51      | 219.36        | 116.20    |

|                          |                 |        |         |         |         |        |
|--------------------------|-----------------|--------|---------|---------|---------|--------|
| Vertical density         | %               | 0.08   | 0.35    | 0.20    | 0.19    | 0.05   |
| Mean height              | length*         | 0.09   | 0.55    | 0.25    | 0.20    | 0.10   |
| Median height            | length*         | 0.09   | 0.55    | 0.24    | 0.21    | 0.10   |
| Height variation         | length*         | 0.01   | 0.18    | 0.06    | 0.03    | 0.05   |
| Highest leaf 16          | cm              | 36.00  | 124.00  | 72.08   | 73.00   | 26.00  |
| Highest inflorescence 16 | cm              | 0.00   | 141.00  | 66.17   | 75.50   | 43.87  |
| Highest leaf 17          | cm              | 16.00  | 72.00   | 31.25   | 23.00   | 16.37  |
| Highest inflorescence 17 | cm              | 0.00   | 91.00   | 14.67   | 0.00    | 29.61  |
| Hydrological distance    | m               | 2.83   | 586.13  | 142.53  | 91.82   | 156.82 |
| Elevation above river    | m               | 0.26   | 1.71    | 1.24    | 1.31    | 0.37   |
| River kilometre          | km              | 3.64   | 6.98    | 5.15    | 4.99    | 1.08   |
| Shannon diversity index  |                 | 0.14   | 1.73    | 1.12    | 1.16    | 0.44   |
| Leaf pubescence          | %               | 0.00   | 37.50   | 6.90    | 2.50    | 9.27   |
| Leaf area                | cm <sup>2</sup> | 234.29 | 3906.17 | 1487.25 | 1602.99 | 879.92 |

317

## 318 **Sedimentation on and underneath the vegetation**

319 Sedimentation on the vegetation was influenced most strongly by the amount of  
320 vegetation biomass, but also by log hydrological distance and the height variation of the  
321 vegetation as well as the river kilometre ( $R^2=0.56$ , Table 3). The amount of sediment on the  
322 vegetation increased with increasing biomass ( $p<0.01$ ; Fig 2a) and decreased with increasing  
323 height variation of the vegetation ( $p=0.03$ ; Fig 2b). In addition, sedimentation on the  
324 vegetation decreased with log hydrological distance from the river ( $p=0.01$ ; Fig 2c), while it  
325 increased with the river kilometre ( $p=0.02$ ; Fig 2d).

**Table 3. Model results.** Statistical model results of the sedimentation on the vegetation and on the traps.

| <b>Sediment on vegetation</b>    |                 |                   |                |                    |            |
|----------------------------------|-----------------|-------------------|----------------|--------------------|------------|
|                                  | <b>Estimate</b> | <b>Std. Error</b> | <b>t value</b> | <b>Pr(&gt; t )</b> | <b>Sig</b> |
| <b>(Intercept)</b>               | 37.3320         | 3.5080            | 10.6420        | 0.0000             | ***        |
| <b>River kilometre</b>           | 9.5700          | 3.8320            | 2.4970         | 0.0231             | *          |
| <b>log Hydrological distance</b> | -12.0610        | 4.4330            | -2.7210        | 0.0145             | *          |
| <b>Biomass</b>                   | 14.4820         | 3.9990            | 3.6220         | 0.0021             | **         |
| <b>Highest inflorescence 16</b>  | -6.8990         | 5.0780            | -1.3590        | 0.1920             |            |
| <b>Vertical density</b>          | 7.4390          | 3.8380            | 1.9380         | 0.0694             | .          |
| <b>Height variation</b>          | -9.6850         | 4.0560            | -2.3880        | 0.0288             | *          |

  

| <b>Sediment on trap</b>          |                 |                   |                |                    |            |
|----------------------------------|-----------------|-------------------|----------------|--------------------|------------|
|                                  | <b>Estimate</b> | <b>Std. Error</b> | <b>t value</b> | <b>Pr(&gt; t )</b> | <b>Sig</b> |
| <b>(Intercept)</b>               | 5.7200          | 0.5990            | 9.5490         | 6.83E-09           | ***        |
| <b>River kilometre</b>           | -0.7547         | 0.4264            | -1.7700        | 0.0920             | .          |
| <b>log Hydrological distance</b> | -1.4044         | 0.3458            | -4.0610        | 0.0006             | ***        |
| <b>Precipitation</b>             | -1.4622         | 0.8481            | -1.7240        | 0.1001             |            |

326 **Fig 2. Sedimentation on the vegetation.** Sedimentation on the vegetation explained by (a)  
 327 biomass, (b) height variation, (c) log hydrological distance, and (d) river kilometre.

328 The sedimentation on the sediment traps was driven by a single topographic variable, the  
 329 log hydrological distance to the river ( $R^2=0.42$ , Table 3). Sediment traps with a short

330 hydrological distance (close to the river) collected more sediment, and sedimentation  
331 decreased with a larger hydrological distance ( $p < 0.01$ , Fig 3).

332 **Fig 3. Sedimentation on traps.** Sedimentation on traps explained by log hydrological  
333 distance.

334 Additionally, the ratio of sedimentation on the vegetation to sedimentation on the traps  
335 was driven by the hydrological distance and, the river kilometre as well as their interaction  
336 ( $R^2 = 0.62$ , S1 Table). The ratio was low with short hydrological distance, meaning that  
337 relatively more sediment settled on the traps close to the river, and decrease with  
338 increasing hydrological distance ( $p < 0.01$ , S4a Figure). There was also relatively more  
339 sediment on the traps at the upstream study sites, while sedimentation on the biomass  
340 relatively increased downstream the river ( $p < 0.01$ , S4b Figure). The interaction of river  
341 kilometre and hydrological distance was also significant ( $p < 0.01$ , S4b Figure), showing that  
342 with increasing river kilometre (i.e. more downstream), the relative increase of  
343 sedimentation on the vegetation is stronger with hydrological distance than at more  
344 upstream sites.

### 345 **Carbon, nitrogen and phosphorus in the sediment**

346 Carbon, nitrogen and phosphorus content in the sediment strongly increased with the  
347 total amount of sediment on the vegetation (Fig 4) and log sediment on the traps ( $p < 0.01$   
348 for all models, S2 Table). In addition, N on the vegetation increased with vegetation biomass  
349 ( $p = 0.01$ ) and with log hydrological distance ( $p < 0.01$ ,  $R^2 = 0.79$ , Fig 4, S2 Table). Carbon and P  
350 on the vegetation additionally increased with log hydrological distance (both  $p < 0.01$ ,  
351  $R^2 = 0.80$  and  $0.92$ , respectively, Fig 4, S2 Table). Carbon and N content in the sediment on

352 the traps increased with the river kilometre (both  $p=0.02$ ,  $R^2=0.64$  and  $0.62$ , respectively, S2  
353 Table), while P content in the sediment on the traps was only explained by the amount of  
354 sediment on the trap ( $R^2=0.84$ , S2 Table).

355 **Fig 4. Nutrients on the vegetation.** Carbon, nitrogen and phosphorus on the vegetation  
356 explained by the amount of sediment on the vegetation, and grouped for low and high  
357 hydrological distances from the river.

358 The N:P ratio in the sediment on the vegetation for sites closer to the river and further  
359 away from the river did not differ significantly ( $p=0.095$ ). However, there was a trend  
360 towards a higher N:P ratio further away from the river. The same comparison (close and far  
361 away from the river) for the N:P ratio in the sediment on the traps showed a significantly  
362 higher N:P ratio for the sites further away from the river ( $p=0.001$ ).

363

## 364 Discussion

365 With this study, we disentangled *in situ* measurements of sedimentation on and  
366 underneath the vegetation on a floodplain and quantifying its relative importance in  
367 relation to topographic drivers. Biomass and height variation increase sedimentation on the  
368 vegetation, while vegetation characteristics did not explain sedimentation underneath the  
369 vegetation. The hydrological distance was a key variable explaining sediment and nutrient  
370 retention on and underneath the vegetation. Carbon, N and P on the vegetation increased  
371 with hydrological distance from the river in spite of the decreasing amount of sediment with  
372 increasing hydrological distance. We could not find evidence that species diversity and leaf  
373 surface structure affect the amount of sediment and nutrient retention.

## 374 **Vegetation characteristics**

375 Regarding hypothesis (H1), we found evidence that sedimentation on the vegetation  
376 increased with increasing plant biomass and decrease with height variation. More  
377 vegetation biomass is able to provide a larger surface for sediment to settle, and thus  
378 increase sedimentation on the biomass, as it was found in the flume experiments (23,26).  
379 However, we also expected that the sedimentation on the ground underneath the  
380 vegetation would increase with increasing biomass as a consequence of a stronger  
381 reduction in flow velocity, as it was found in the flume experiment (23), but this was not  
382 supported by our findings. Three reasons might explain this: (1) it is likely that larger grain  
383 sizes (sand) accumulated underneath the vegetation, which might be less affected by the  
384 biomass above; (2) the effect of the hydrological distance on the sedimentation underneath  
385 the vegetation overrides the effects of the vegetation structure; and (3) decomposition of  
386 the plant biomass started and might already change the vegetation structure compared to  
387 the flume experiment conducted at the biomass pike. Other studies found positive or non-  
388 significant relations between standing biomass and trapped sediment on the ground  
389 (20,24,38). In general, we expect sediment on the vegetation to be finer grained (silt and  
390 clay), since larger grain sizes (sand or coarser) do not adhere on most of vegetation surfaces.  
391 Many important plant nutrients occur in or are associated with fine sediment (40,68). Thus,  
392 this clearly shows (1) the relevant role of standing biomass for sediment retention during  
393 the flood season, and (2) emphasizes the importance of the vegetation surface for fine  
394 sedimentation and nutrient retention.

395 In the flume experiment it was found that density increases sedimentation on the  
396 vegetation (23), which only showed a marginally significant increase in the present study.

397 We did not find any statistical evidence that the vegetation height explains sedimentation,  
398 but other studies did (22,23,30). However, we found that variation of vegetation height  
399 explained sedimentation on the vegetation, even though most of the vegetation was not  
400 fully inundated. The stronger the height variation, the lower was the sediment retention on  
401 the vegetation, meaning that a more even vegetation surface collected more sediment on  
402 the vegetation. The same was found in the flume experiment (23). Others found that the  
403 intercepted biovolume calculated by the vegetation cover times the inundation depth  
404 explained a large fraction of the sedimentation on the ground (69). We could not measure  
405 the inundation depth (water level above the ground per plot), which we expected that it  
406 would increase the importance of the vegetation height and density.

## 407 **Topography**

408 Regarding topographic parameters, we found support for hypothesis (H2) that  
409 sedimentation on the vegetation as well as underneath the vegetation decreased with  
410 increasing hydrological distance to the river. In contrast, C, N and P on the vegetation  
411 increased with the hydrological distance.

412 With increasing distance from the river, the flow velocity is likely to decrease and more  
413 sediment has already settled, thereby reducing the potential sedimentation on plots with  
414 longer water paths. Even though decreasing sedimentation on and underneath the  
415 vegetation was observed with hydrological distance, the three plots farthest away from the  
416 river did not had the lowest sedimentation rates; they were more than 400 m (413 - 586 m)  
417 away, while all other plots were in the range of 300 m to the river. In the same three plots  
418 the sedimentation, especially underneath the vegetation, was still reasonably high (19.65 –  
419 66.85 mg m<sup>-2</sup> [overall median 60.55 mg m<sup>-2</sup>]), which is in contrast with other studies that

420 found exponential decreasing sedimentation rates on horizontal lines in the floodplain  
421 (70,71). Also other studies found decreasing amounts of sediment with increasing straight  
422 distance from the river (27,29,40,72), with increasing flow path (42) and with decreasing  
423 hydrological connectivity (15,43,44). Our result show the substantial role of shallow sites,  
424 such as abandoned meander and depression within the floodplain for sediment retention.  
425 We additionally found that the ratio of sedimentation on vegetation and on the traps  
426 increased with hydrological distance. Thus, our results emphasize the crucial role of  
427 vegetation for floodplain sedimentation.

428 With increasing river kilometre sediment on the vegetation and C and N underneath the  
429 vegetation increased. We expected that all three study areas receive comparable amounts  
430 of sediment with respect to quality and quantity. However, it is possible that the sites  
431 further downstream (further away from the last tributary) receive less sediment with larger  
432 grain size than the ones further upstream. We also visually observed lower flow velocities at  
433 the downstream site, at least for those plots close to the stream, which might additionally  
434 cause hither fine grained sediment, C and N retention with increasing river kilometre. For a  
435 better understanding of the key drivers, more hydraulic and hydromorphological  
436 parameters, such as discharge, inundation duration and flow velocity need to be included in  
437 the analysis (71). Still, while results could have been different for e.g. more extreme floods,  
438 our study helps to improve our general understanding of the mechanisms and processes  
439 causing sedimentation on floodplains.

## 440 **Carbon, nitrogen and phosphorus on the vegetation**

441 Our results further support the hypothesis (H5) that nutrients (C, N and P) in the  
442 sediment increased with the amount of sediment. In addition to that, this study shows that



443 C, N and P on the vegetation increased with greater hydrological distance. Thus, we  
444 observed relatively more nutrients on the vegetation far away from the river even though  
445 there is less total amount of sediment. Carbon and P are bound to fine grained sediment,  
446 while nitrogen is only partially associated with sediment, but it still follows similar  
447 distribution patterns (40,73). Thus, we can derive that the vegetation primarily captures  
448 finer sediment (silt, clay, and organic material), which probably also decreases in size with  
449 distance from the river, but has more nutrients bound to it. With this result, our study  
450 emphasized again the crucial role of shallow sites far inside the floodplain, such as  
451 abandoned meander and depression, for fine sediment and nutrient retention during floods.

452 In addition, we found an increasing N:P ratio for sites further away from the river. These  
453 changes in elemental ratios provided evidence of changes in the nutrient composition of the  
454 sediment with distance to the river main channel. A higher N:P ratio indicated a higher N  
455 availability compared to P, which suggests that N is relatively more limiting for plant growth  
456 close to the river channel, and that P is relatively more limiting for plant growth further  
457 away from the river main channel. Subsequent mineralization processes could provide  
458 additional nutrient sources for plant growth and stimulate nutrient uptake in terrestrial  
459 parts of the floodplain, as well as it might also affect community composition due to  
460 changed availability of plant nutrients (74).

## 461 **Diversity and leaf surface structure**

462 We did not find any evidence for our hypotheses regarding species diversity (H3). The  
463 flume experiment also only showed effects of species richness on sedimentation, when  
464 species identity effects were not considered (26). Similarly, others did not find any  
465 significant differences in sediment capture capacity between monocultures and a three-

466 species mixture in an experiment (37). Nevertheless, it is known that species diversity can  
467 correlate with vegetation structure (34), and in the flume experiment it was found that  
468 structural diversity increase sedimentation on patches (23). From grassland experiments we  
469 know that more diverse vegetation is denser and taller than low diverse vegetation (35,36).

470 We also did not find evidence for the importance of the leaf pubescence and leaf area in  
471 this study (H4), even though in previous studies both have been found to represent relevant  
472 traits for sedimentation (38,39). Three reasons might explain that: (1) Pubescent species  
473 were rather poorly represented within our floodplain (five species with a cover mean of  
474 6.9 %), so that we had limited statistical power to test for its potential effects. (2) Including  
475 stem density and mean number of leaves per individual seems likely to allow a more precise  
476 estimation of the pubescence and the leaf area effect at the plot level (38). (3) Especially for  
477 leaf pubescence the seasonality of the flood could be relevant, since decomposition  
478 processes might already have diminished the leaf hairs.

## 479 **Conclusion**

480 With our *in situ* measurements, we improve the understanding of sediment and nutrient  
481 retention in floodplains by providing insights on the vegetation structure besides the  
482 floodplain topography and simultaneously disentangling sedimentation on and underneath  
483 the vegetation. Notably, we found that more biomass increases sediment and nutrient  
484 retention on the vegetation. Sedimentation decreases with hydrological distance to the  
485 river, even though it is still reasonably high beyond distances of 400 m. Nutrients (C, N, and  
486 P) in the sediment on the vegetation, however, increase with distance to the river. Based on  
487 the results about sediment and nutrient retention, we can recommend the following  
488 management practices: First, reduced mowing for more standing vegetation biomass during

489 the flood season, since biomass increase sediment and nutrient retention. Especially, for  
490 nutrient retention, this counts for shallow areas with high hydrological distance to the river.  
491 The mowing regime might be less important, if the focus is on maximal sediment retention,  
492 which on a mass basis happens more strongly underneath the vegetation without clear  
493 effects of the vegetation structure. Of course, trade-offs between sediment retention and  
494 other management goals, such as biodiversity conservation, should be taken into  
495 consideration when making decisions about floodplain management. Second, the strong  
496 importance of the topographical variable 'hydrological distance' for sediment and nutrient  
497 retention emphasizes the high value of laterally connected river-floodplain systems,  
498 including long abandoned meanders and depressions. Thus, our study suggests (1) an  
499 improvement of lateral connectivity to be able to use the potential retention hotspots far  
500 inside the floodplain, and in accordance with that (2) an adapted mowing regime on the  
501 floodplain to achieve the management regarding sediment and nutrient retention, and  
502 therefore the ecosystem function of water purification of the river.

## 503 **Acknowledgments**

504 We thank the Federal Ministry of Education and Research (BMBF) and the Federal Agency  
505 for Nature Conservation (BfN) for funding the project (Wilde Mulde – Revitalisation of a  
506 dynamic riverine landscape in Central Germany (funding label: 01LC1322E)). We thank the  
507 TRY-initiative – a global database of plant traits and all contributors for providing the data.  
508 We also thank our student assistants (Antonia Ludwig and Georg Rieland) for supporting the  
509 fieldwork and Katie Barry for English prove reading.

## 510 **References**

- 511 1. Hunter HM, Walton RS. Land-use effects on fluxes of suspended sediment, nitrogen  
512 and phosphorus from a river catchment of the Great Barrier Reef, Australia. *J Hydrol.*  
513 2008;356(1–2):131–46.
- 514 2. Sharma P, Rai SC. Streamflow, sediment and carbon transport from a Himalayan  
515 watershed. *J Hydrol.* 2004;289(1–4):190–203.
- 516 3. Tockner K, Pusch M, Borchardt D, Lorang MS. Multiple stressors in coupled river-  
517 floodplain ecosystems. *Freshw Biol.* 2010;55:135–51.
- 518 4. Turnpenny AWH, Williams R. Effects of sedimentation on the gravels of an industrial  
519 river system. *J Fish Biol.* 1980;17(6):681–93.
- 520 5. Carpenter SR, Caraco NF, Correll DL, Howarth RW, Sharpley AN, Smith VH. Nonpoint  
521 pollution of surface waters with phosphorus and nitrogen. *Ecol Appl.* 1998;8(3):559–  
522 68.
- 523 6. Habersack H, Hein T, Stanica A, Liska I, Mair R, Jäger E, et al. Challenges of river basin  
524 management: Current status of, and prospects for, the River Danube from a river  
525 engineering perspective. *Sci Total Environ.* 2016;543:828–45.
- 526 7. Naiman RJ, Décamps H. The ecology of interfaces: Riparian zones. *Annu Rev Ecol Syst.*  
527 1997;28:621–58.
- 528 8. Noe GB, Hupp CR. Carbon, nitrogen, and phosphorus accumulation in floodplains of  
529 Atlantic Coastal Plain rivers, USA. *Ecol Appl.* 2005;15(4):1178–90.
- 530 9. Conte M, Ennaanay D, Mendoza G, Walter MT, Wolny S, Freyberg D, et al. Retention

- 531 of nutrients and sediment by vegetation. In: Kareiva P, Tallis H, Ricketts TH, Daily GC,  
532 Polasky S, editors. Natural Capital: Theory and Practice of Mapping Ecosystem  
533 Services. Oxford: Oxford University Press; 2011.
- 534 10. Hopkins KG, Noe GB, Franco F, Pindilli EJ, Gordon S, Metes MJ, et al. A method to  
535 quantify and value floodplain sediment and nutrient retention ecosystem services. *J*  
536 *Environ Manage.* 2018;220(December 2017):65–76.
- 537 11. Noe GB, Hupp CR. Retention of riverine sediment and nutrient loads by coastal plain  
538 floodplains. *Ecosystems.* 2009;12(5):728–46.
- 539 12. Olde Venterink H, Vermaat JE, Pronk M, Wiegman F, van der Lee GEM, van der Hoorn  
540 MW, et al. Importance of sediment deposition and denitrification for nutrient  
541 retention in floodplain wetlands. *Appl Veg Sci.* 2006;9(2):163–74.
- 542 13. Steiger J, Tabacchi E, Dufour S, Corenblit D, Peiry JL. Hydrogeomorphic processes  
543 affecting riparian habitat within alluvial channel-floodplain river systems: A review for  
544 the temperate zone. *River Res Appl.* 2005;21(7):719–37.
- 545 14. Tockner K, Stanford JA. Riverine flood plains: Present state and future trends. *Environ*  
546 *Conserv.* 2002;29:308–30.
- 547 15. Wolf KL, Noe GB, Ahn C. Hydrologic connectivity to streams increases nitrogen and  
548 phosphorus inputs and cycling in soils of created and natural floodplain wetlands. *J*  
549 *Environ Qual.* 2013;42(4):1245–55.
- 550 16. Wohl E, Bledsoe BP, Jacobson RB, Poff NL, Rathburn SL, Walters DM, et al. The natural  
551 sediment regime in rivers: Broadening the foundation for ecosystem management.

- 552 Bioscience. 2015;65(4):358–71.
- 553 17. Corenblit D, Baas ACW, Bornette G, Darrozes J, Delmotte S, Francis RA, et al.  
554 Feedbacks between geomorphology and biota controlling Earth surface processes  
555 and landforms: A review of foundation concepts and current understandings. Earth-  
556 Science Rev. 2011;106(3–4):307–31.
- 557 18. Camporeale C, Perucca E, Ridolfi L, Gurnell AM. Modeling the interaction between  
558 river morphodynamics and riparian vegetation. Rev Geophys. 2013;51(2012):379–  
559 414.
- 560 19. Steiger J, Gurnell AM. Spatial hydrogeomorphological influences on sediment and  
561 nutrient deposition in riparian zones: Observations from the Garonne River, France.  
562 Geomorphology. 2002;49:1–23.
- 563 20. Elliott AH. Settling of fine sediment in a channel with emergent vegetation. J Hydraul  
564 Eng. 2000;126(8):570–7.
- 565 21. Manners R, Schmidt J, Wheaton JM. Multiscalar model for the determination of  
566 spatially explicit riparian vegetation roughness. J Geophys Res Earth Surf.  
567 2013;118(1):65–83.
- 568 22. Corenblit D, Steiger J, Gurnell AM, Naiman RJ. Plants intertwine fluvial landform  
569 dynamics with ecological succession and natural selection: A niche construction  
570 perspective for riparian systems. Glob Ecol Biogeogr. 2009;18(4):507–20.
- 571 23. Kretz L, Koll K, Seele-Dilbat C, van der Plas F, Weigelt A, Wirth C. Vegetation structure  
572 alters fine sediment retention on and underneath herbaceous vegetation in a flume

- 573 experiment. PLoS One. 2021;1–16.
- 574 24. Burylo M, Rey F, Bochet E, Dutoit T. Plant functional traits and species ability for  
575 sediment retention during concentrated flow erosion. *Plant Soil*. 2012;353(1–2):135–  
576 44.
- 577 25. Gurnell AM, Bertoldi W, Corenblit D. Changing river channels: The roles of  
578 hydrological processes, plants and pioneer fluvial landforms in humid temperate,  
579 mixed load, gravel bed rivers. *Earth-Science Rev*. 2012;111(1–2):129–41.
- 580 26. Kretz L, Koll K, Seele-Dilbat C, van der Plas F, Weigelt A, Wirth C. Effects of plant  
581 species identity overrides diversity effects in explaining sedimentation within  
582 vegetation in a flume experiment. *Int Rev Hydrobiol*. 2021.
- 583 27. Västilä K, Järvelä J. Characterizing natural riparian vegetation for modeling of flow  
584 and suspended sediment transport. *J Soils Sediments*. 2018;18(10):3114–30.
- 585 28. Akram S, Yu B, Ghadiri H, Rose C, Hussein J. The links between water profile, net  
586 deposition and erosion in the design and performance of stiff grass hedges. *J Hydrol*.  
587 2014;510:472–9.
- 588 29. Asselman NEM, Middelkoop H. Floodplain sedimentation: Quantities, patterns and  
589 processes. *Earth Surf Process Landforms*. 1995;20(1 995):481–99.
- 590 30. Västilä K, Järvelä J, Koivuor H. Flow-vegetation-sediment interaction in a cohesive  
591 compound channel. *J Hydraul Eng*. 2016;142(1).
- 592 31. Nilsson C, Berggren K. Alterations of riparian ecosystems caused by river regulation.  
593 *Bioscience*. 2000;50(9):783.



- 594 32. Olson DM, Dinerstein E. The global 200: A representation approach to conserving the  
595 earth's most biologically valuable ecoregions. *Conserv Biol.* 1998;12(3):502–15.
- 596 33. Tilman D, Isbell F, Cowles JM. Biodiversity and ecosystem functioning. *Annu Rev Ecol*  
597 *Evol Syst.* 2014;45:471–93.
- 598 34. Proulx R, Roca IT, Cuadra FS, Seiferling I, Wirth C. A novel photographic approach for  
599 monitoring the structural heterogeneity and diversity of grassland ecosystems. *J Plant*  
600 *Ecol.* 2014;7(6):518–25.
- 601 35. Lorentzen S, Roscher C, Schumacher J, Schulze ED, Schmid B. Species richness and  
602 identity affect the use of aboveground space in experimental grasslands. *Perspect*  
603 *Plant Ecol Evol Syst.* 2008;10(2):73–87.
- 604 36. Wacker L, Baudois O, Eichenberger-Glinz S, Schmid B. Effects of plant species richness  
605 on stand structure and productivity. *J Plant Ecol.* 2009;2(2):95–106.
- 606 37. Kervroëdan L, Armand R, Saunier M, Faucon MP. Effects of plant traits and their  
607 divergence on runoff and sediment retention in herbaceous vegetation. *Plant Soil.*  
608 2019;511–24.
- 609 38. Kervroëdan L, Armand R, Saunier M, Ouvry J, Faucon M. Plant functional trait effects  
610 on runoff to design herbaceous hedges for soil erosion control. *Ecol Eng.*  
611 2018;118(December 2017):143–51.
- 612 39. Kretz L, Seele C, van der Plas F, Weigelt A, Wirth C. Leaf area and pubescence drive  
613 sedimentation on leaf surfaces during flooding. *Oecologia.* 2020;193(3):535–45.
- 614 40. Sival FP, Makaske B, Maas GJ, Runhaar J. Floodplain sedimentation regulating

- 615           vegetation productivity on small rivers? In: Research for Managing Rivers: Present  
616           and Future Issues. 2005. p. 82–3.
- 617    41.    Hupp CR. Hydrology, geomorphology and vegetation of costal plain rivers in the  
618           south-eastern USA. *Hydrol Process.* 2000;14(August 1999):2991–3010.
- 619    42.    Middelkoop H, Van der Perk M. Modelling spatial patterns of overbank sedimentation  
620           on embanked floodplains. *Geogr Ann.* 1998;80:95–109.
- 621    43.    Tockner K, Pennetzdorfer D, Reiner N, Schiemer F, Ward JV. Hydrological connectivity,  
622           and the exchange of organic matter and nutrients in a dynamic river-floodplain  
623           system (Danube, Austria). *Freshw Biol.* 1999;41(3):521–35.
- 624    44.    Rodríguez M, Steiger J, Rosales J, Laraque A, López JL, Castellanos B, et al. Multi-  
625           annual contemporary flood event overbank sedimentation within the vegetated  
626           lower Orinoco floodplain, Venezuela. *River Res Appl.* 2019;35(8):1241–56.
- 627    45.    Magurran AE. Ecological diversity and its measurement. Press PU, editor. Princeton;  
628           1988.
- 629    46.    R Core Team. R: A language and environment for statistical computing. R Foundation  
630           for Statistical Computing. Vienna, Austria; 2020. <https://www.r-project.org/>
- 631    47.    Aureliano Netto AF, Nogueira Martins R, Aquino de Souza GS, Araújo GDM, Hatum de  
632           Almeida SL, Agnolette Capelini V. Segmentation of Rgb Images Using Different  
633           Vegetation Indices and Thresholding Methods. *Nativa.* 2018;6(4):389.
- 634    48.    Pau G, Fuchs F, Sklyar O. EBIImage - an R package for image processing with  
635           applications to cellular phenotypes. *Bioinformatics.* 2010;26(7):979–81.

- 636 49. Steiger J, Gurnell AM, Goodson JM. Quantifying and characterizing contemporary  
637 riparian sedimentation. *River Res Appl.* 2003;19(4):335–52.
- 638 50. Brodie CR, Leng MJ, Casford JSL, Kendrick CP, Lloyd JM, Yongqiang Z, et al. Evidence  
639 for bias in C and N concentrations and  $\delta^{13}\text{C}$  composition of terrestrial and aquatic  
640 organic materials due to pre-analysis acid preparation methods. *Chem Geol.*  
641 2011;282(3–4):67–83.
- 642 51. Schwanghart W, Scherler D. Short Communication: TopoToolbox 2 - MATLAB-based  
643 software for topographic analysis and modeling in Earth surface sciences. *Earth Surf*  
644 *Dyn.* 2014;2(1):1–7.
- 645 52. MathWorks. MATLAB and Statistics Toolbox Release, Inc., Natick,. Massachusetts,  
646 United States; 2016.
- 647 53. Kattge J, Bönisch G, Diaz S. TRY plant trait database – enhanced coverage and open  
648 access. *Glob Chang Biol.* 2020;26(Data requested between 06th of August and 27th of  
649 September 2019.):119– 188.
- 650 54. Campetella G, Botta-Dukát Z, Wellstein C, Canullo R, Gatto S, Chelli S, et al. Patterns  
651 of plant trait-environment relationships along a forest succession chronosequence.  
652 *Agric Ecosyst Environ.* 2011;145(1):38–48.
- 653 55. Dalke IV, Novakovskiy AB, Maslova SP, Dubrovskiy YA. Morphological and functional  
654 traits of herbaceous plants with different functional types in the European Northeast.  
655 *Plant Ecol.* 2018;219(11):1295–305.
- 656 56. Price CA, Enquist BJ. Scaling mass and morphology in leaves: An extension of the wbe

- 657 model. *Ecology*. 2007;88(5):1132–41.
- 658 57. Wright IJ, Dong N, Maire V, Prentice IC, Westoby M, Díaz S, et al. Global climatic  
659 drivers of leaf size. *Science* (80- ). 2017;357(6354):917–21.
- 660 58. Fitter AH, Peat HJ. The Ecological Flora Database. *J Ecol*. 1994;82(2):415–25.
- 661 59. Herz K, Dietz S, Haider S, Jandt U, Scheel D, Bruelheide H. Predicting individual plant  
662 performance in grasslands. *Ecol Evol*. 2017;(April):8958–65.
- 663 60. Herz K, Dietz S, Haider S, Jandt U, Scheel D, Bruelheide H. Drivers of intraspecific trait  
664 variation of grass and forb species in German meadows and pastures. *J Veg Sci*.  
665 2017;28(4):705–16.
- 666 61. Kleyer M, Bekker RM, Knevel IC, Bakker JP, Thompson K, Sonnenschein M, et al. The  
667 LEDA Traitbase: A database of life-history traits of the Northwest European flora. *J*  
668 *Ecol*. 2008;96(6):1266–74.
- 669 62. Laughlin DC, Leppert JJ, Moore MM, Sieg CH. A multi-trait test of the leaf-height-seed  
670 plant strategy scheme with 133 species from a pine forest flora. *Funct Ecol*.  
671 2010;24(3):493–501.
- 672 63. Lhotsky B, Csecserits A, Kovacs B, Botta-Dukat Z. New plant trait records of the  
673 hungarian flora. *Acta Bot Hung*. 2016;58(3–4):397–400.
- 674 64. Milla R, Reich PB. Multi-trait interactions, not phylogeny, fine-tune leaf size reduction  
675 with increasing altitude. *Ann Bot*. 2011;107(3):455–65.
- 676 65. Ordoñez JC, Van Bodegom PM, Witte J-PM, Bartholomeus RP, Van Hal JR, Aerts R.  
677 Plant strategies in relation to resource supply in mesic to wet environments: Does

- 678 theory mirror nature? *Am Nat.* 2010;175(2):225–39.
- 679 66. Fox J, Weisberg S. *An {R} companion to applied regression*. Third. Sage: Thousand  
680 Oaks CA; 2019.
- 681 67. Venables WN, Ripley BD. *Modern applied statistics with S*. Fourth. New York:  
682 Springer; 2002.
- 683 68. Liu X, Zhang X, Zhang M. Major factors influencing the efficacy of vegetated buffers  
684 on sediment trapping: A review and analysis. *J Environ Qual.* 2008;37(5):1667–74.
- 685 69. Corenblit D, Steiger J, Gurnell AM, Tabacchi E, Roques L. Control of sediment  
686 dynamics by vegetation as a key function driving biogeomorphic succession within  
687 fluvial corridors. *Earth Surf Process Landforms.* 2009;34:1790–810.
- 688 70. Walling DE, He Q. The spatial variability of overbank sedimentation on river  
689 floodplains. *Geomorphology.* 1998;24(2–3):209–23.
- 690 71. Steiger J, Gurnell AM, Petts GE. Sediment deposition along the channel margins of a  
691 reach of the middle River Severn, UK. *Regul Rivers-Research Manag.* 2001;17:443–60.
- 692 72. Klaus VH, Sintermann J, Kleinebecker T, Hölzel N. Sedimentation-induced  
693 eutrophication in large river floodplains - An obstacle to restoration? *Biol Conserv.*  
694 2011;144(1):451–8.
- 695 73. Olde Venterink H, Wiegman F, Van der Lee GEM, Vermaat JE. Role of active  
696 floodplains for nutrient retention in the River Rhine. *J Environ Qual.* 2003;32(4):1430–  
697 5.
- 698 74. Antheunisse AM, Loeb R, Lamers LPM, Verhoeven JTA. Regional differences in

699 nutrient limitation in floodplains of selected European rivers: Implications for  
700 rehabilitation of characteristic floodplain vegetation. *River Res Appl.* 2006;22:1039–  
701 55.

## 702 **Supporting information**

703 **S1 Table: Model results.** Statistical model results of the ratio sediment on the vegetation to  
704 sediment on the traps.

705 **S2 Table: Model results.** Statistical model results of carbon, nitrogen and phosphorus on the  
706 vegetation and on the traps.

707 **S1 Figure: Map of the study site.** Map of the three floodplains along the Mulde River with  
708 trap locations.

709 **S2 Figure: Structural photo.** a) Original photo with blue background wall and blue flooring  
710 material in front. b) Automatically analyzed images for vertical density and height  
711 distribution (done with R) with sketch of variables calculated from the image.

712 **S3 Figure: Sediment traps.** Picture of a sediment trap in the field.

713 **S4 Figure: Sedimentation ratio.** Ratio of sediment on vegetation to sediment on traps.

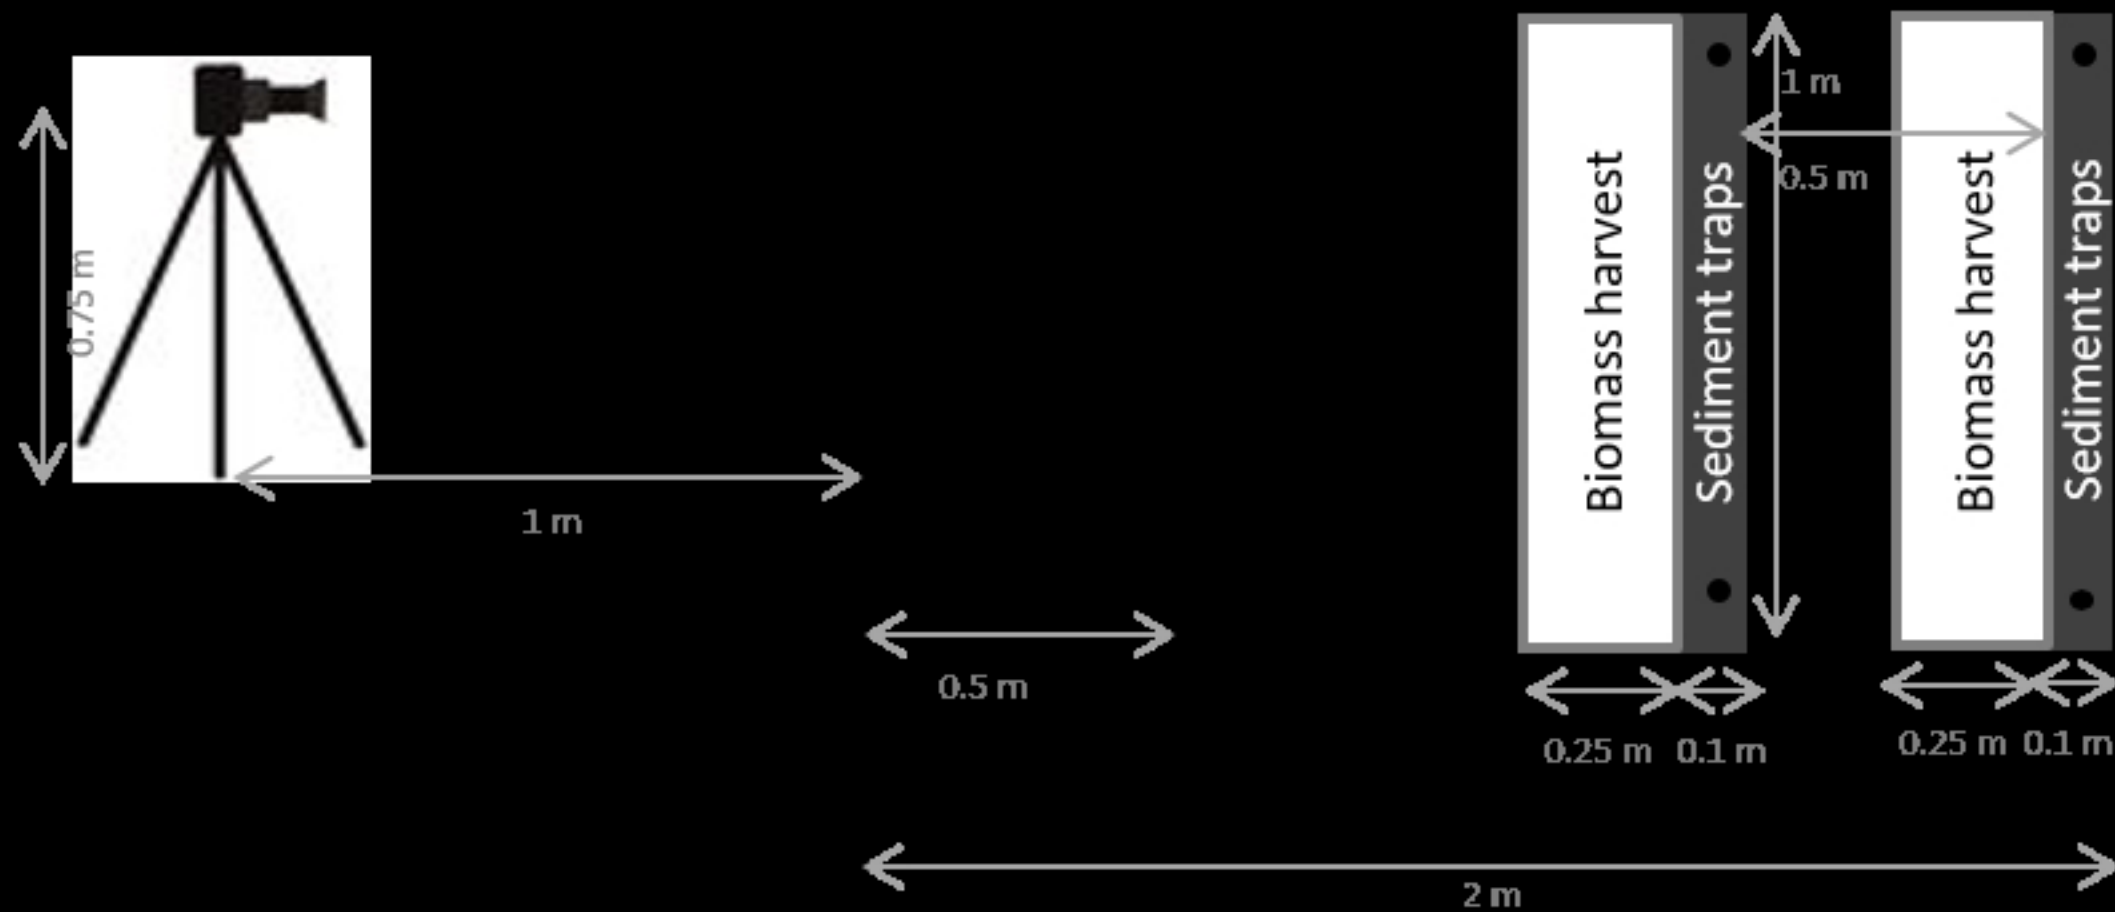

Figure 1



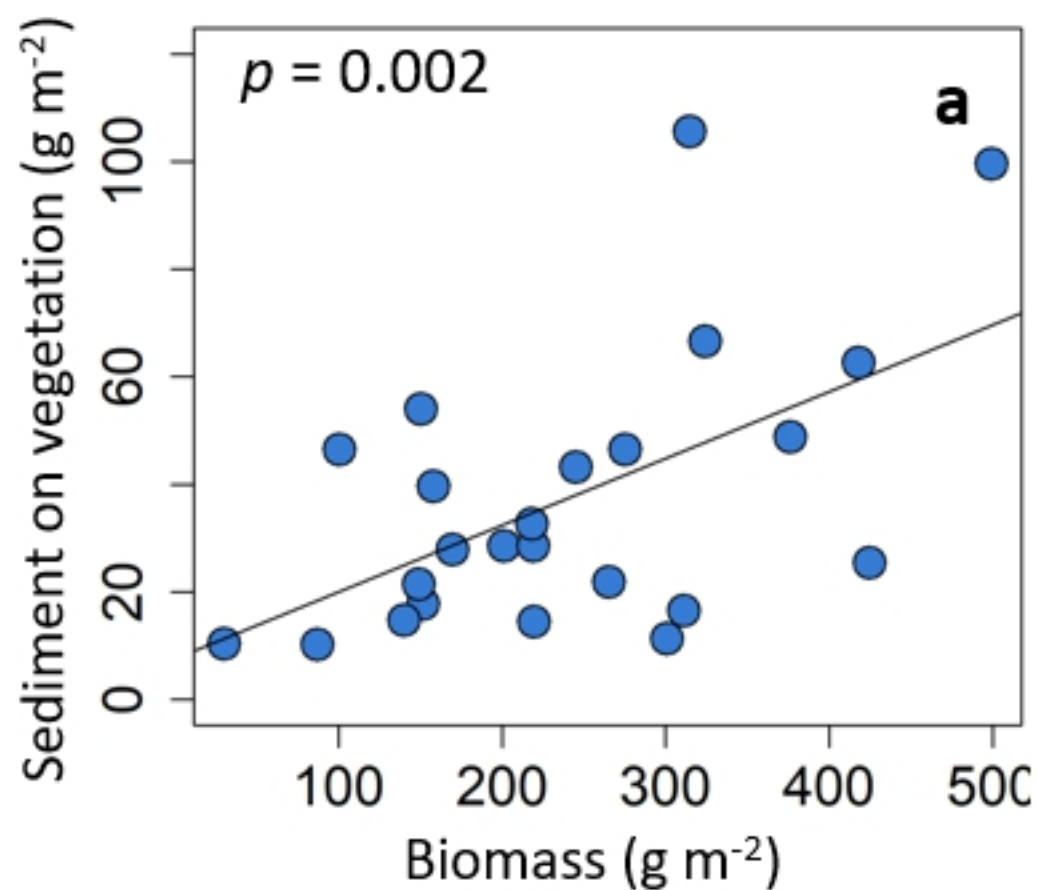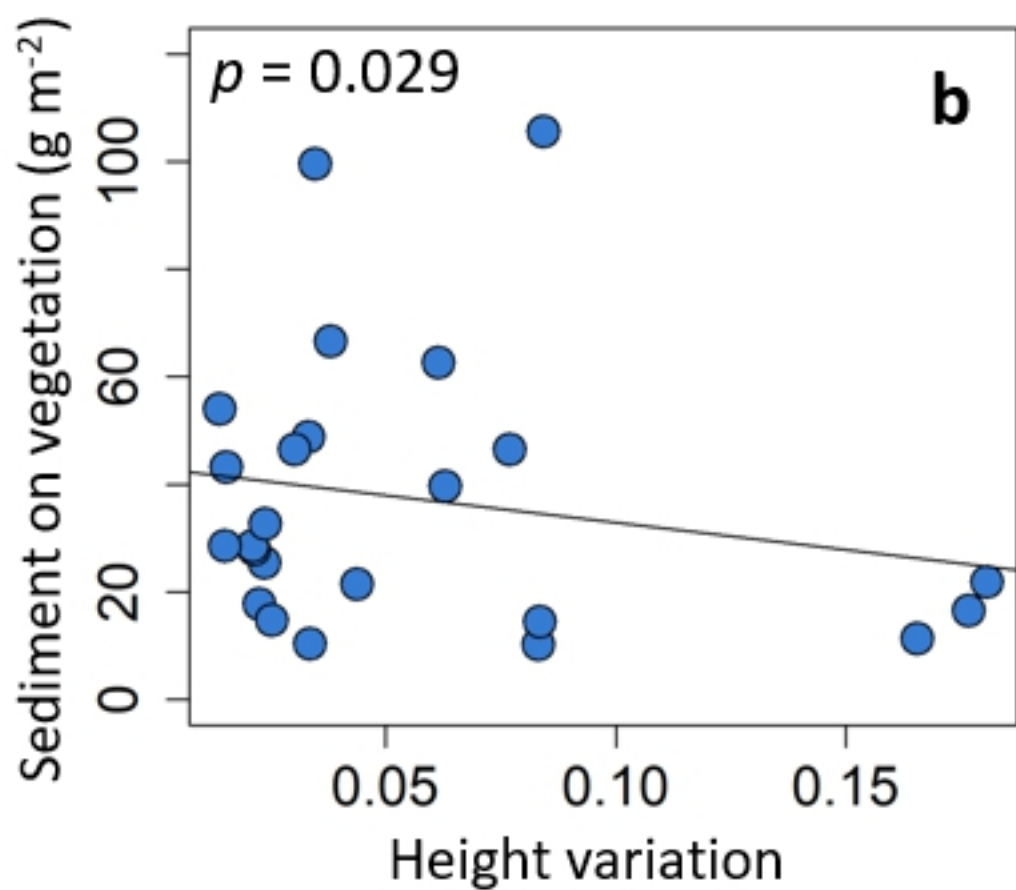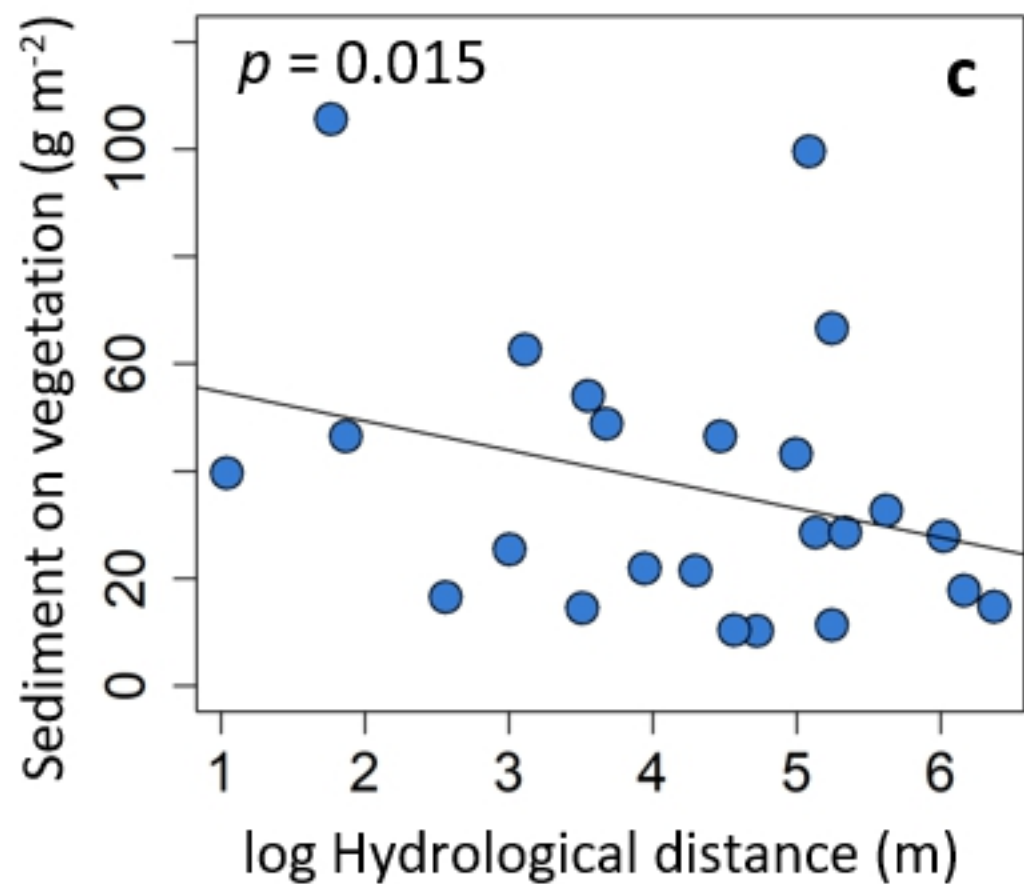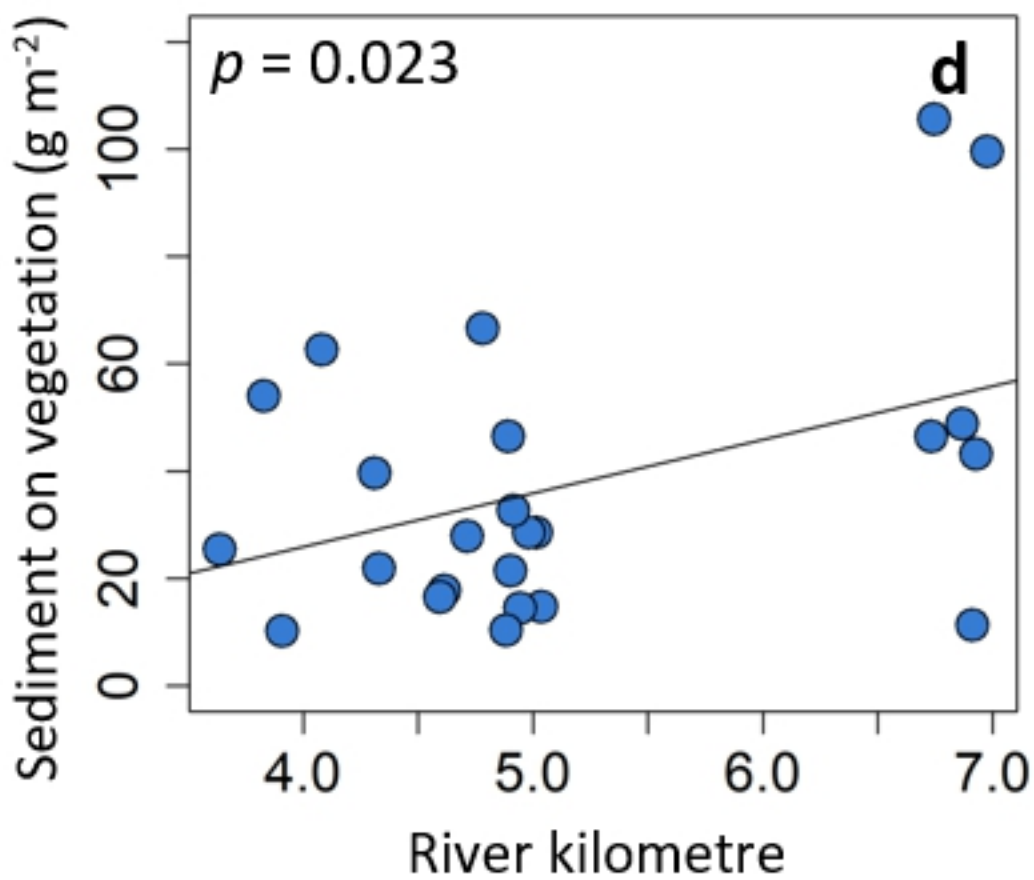

Figure 2

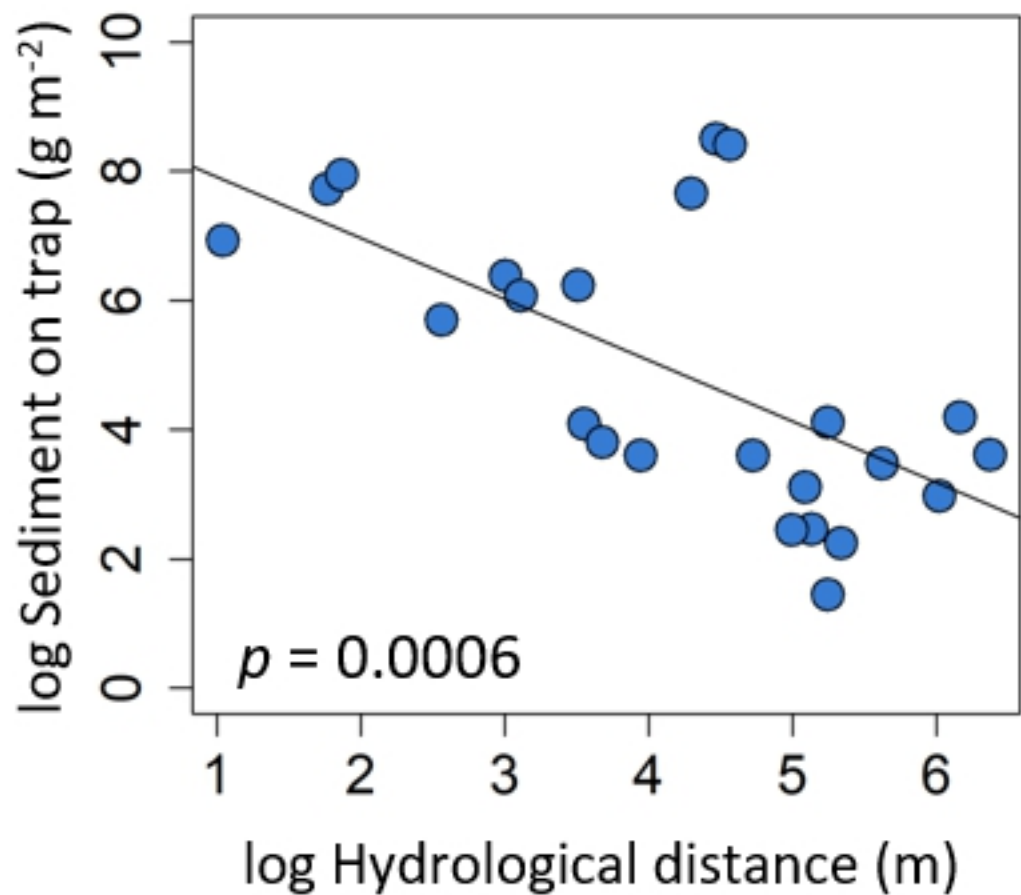

Figure 3

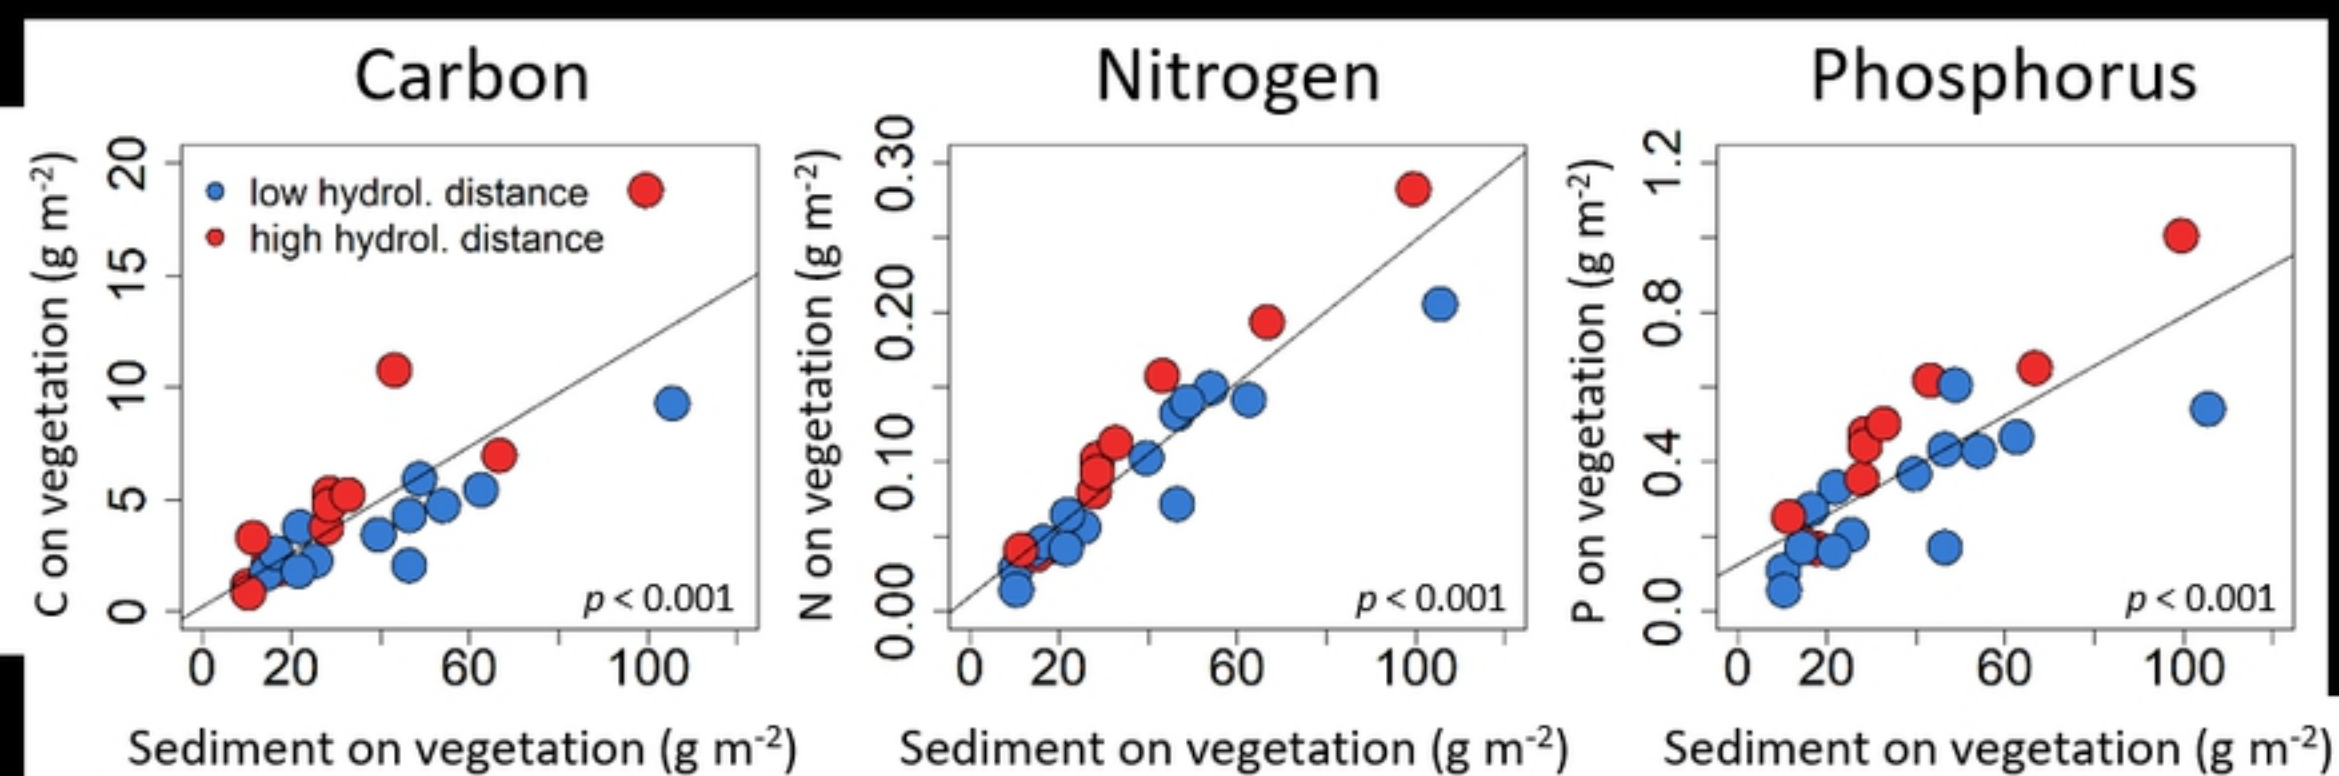

Figure 4
